# Supplementary material for: Stability of domain structures in multi-domain proteins
Source: PubMed Central journal article supplement — Sci Rep. 2011 Jul 18;1:40. doi: 10.1038/srep00040 (PMC3216527; doi:10.1038/srep00040), 2011-07-18
Supplement: srep00040-s1.pdf [file srep00040-s1.pdf]

# Supporting Online Material

For

**Stability of domain structures in multi-domain proteins**

**Ramachandra M. Bhaskara<sup>1</sup> & N. Srinivasan<sup>1\*</sup>**

*<sup>1</sup>Molecular Biophysics Unit, Indian Institute of Science, Bangalore 560012, India.*

**\*To whom correspondence should be addressed. E-mail: ns@mbu.iisc.ernet.in (N.S.)**

**This PDF file includes:**

**Supplementary Figure(S) S1-S4 with legends**

**Supplementary Table S1**

**Supplementary Dataset(s)**

**Supplementary References**

**Supplementary Figure(s).**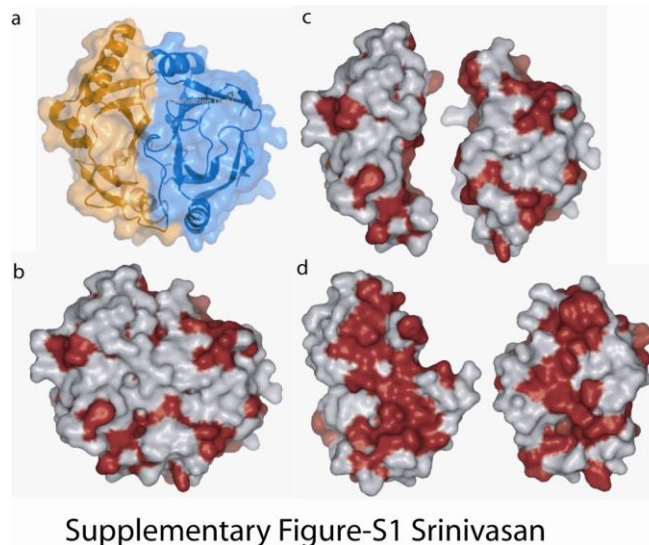**Supplementary Figure S1****Stability and folding of a representative multi-domain enzyme (Dioxygenase, Bhpc). a.**

Ribbon diagram showing the topology of the two interacting domains. **b.** Surface representation of the same showing the apolar residues (Red). **c.** The artificial (in silico) parsing of the full length protein into two isolated domains. These isolated domains were used for free energy computations. Their stabilities are -16 kcal/mol (Domain 1) and 2 kcal/mol (Domain 2). **d.** 90° rotation of the two domains showing the exposed hydrophobic patch. Hydrophobic bonding at the domain-domain interface holds the domains together. Apolar solvation energy of -54 kcal/mol contributes maximally towards the overall stability of -80 Kcal/mol.

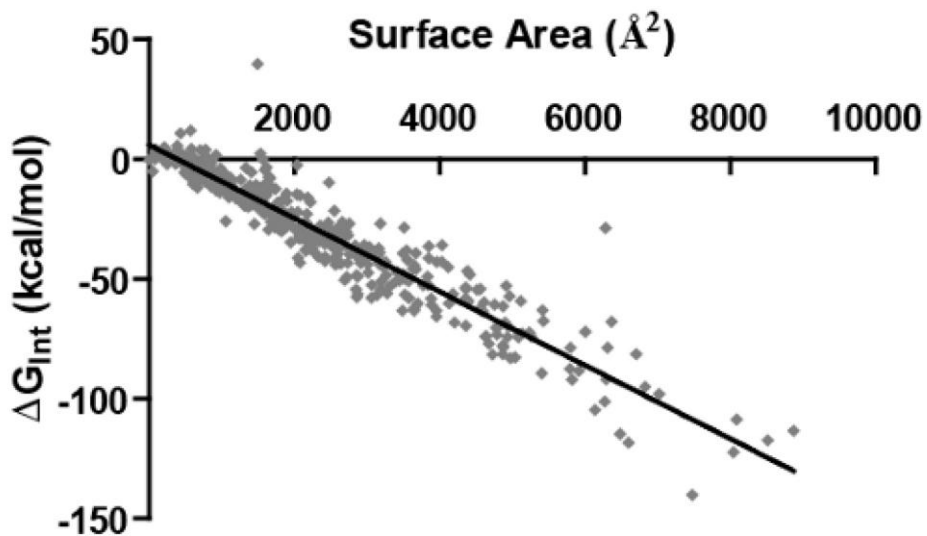

Supplementary Figure-S2 Srinivasan

### **Supplementary Figure S2**

**Interaction free energy as a function of interacting surface area.** Scatter plot showing the linear relationship between the surface area of interaction and the FoldX computed interaction free energy ( $\Delta G_{\text{int}}$ ) for a set of 268 obligate protein-protein complexes. Red line shows the best fit line in linear regression analysis:  $r^2 = 0.6971$ ;  $P < 0.0001$ ;  $\Delta G_{\text{int}} = -0.01274 \cdot \text{SA} + 1.426$ .

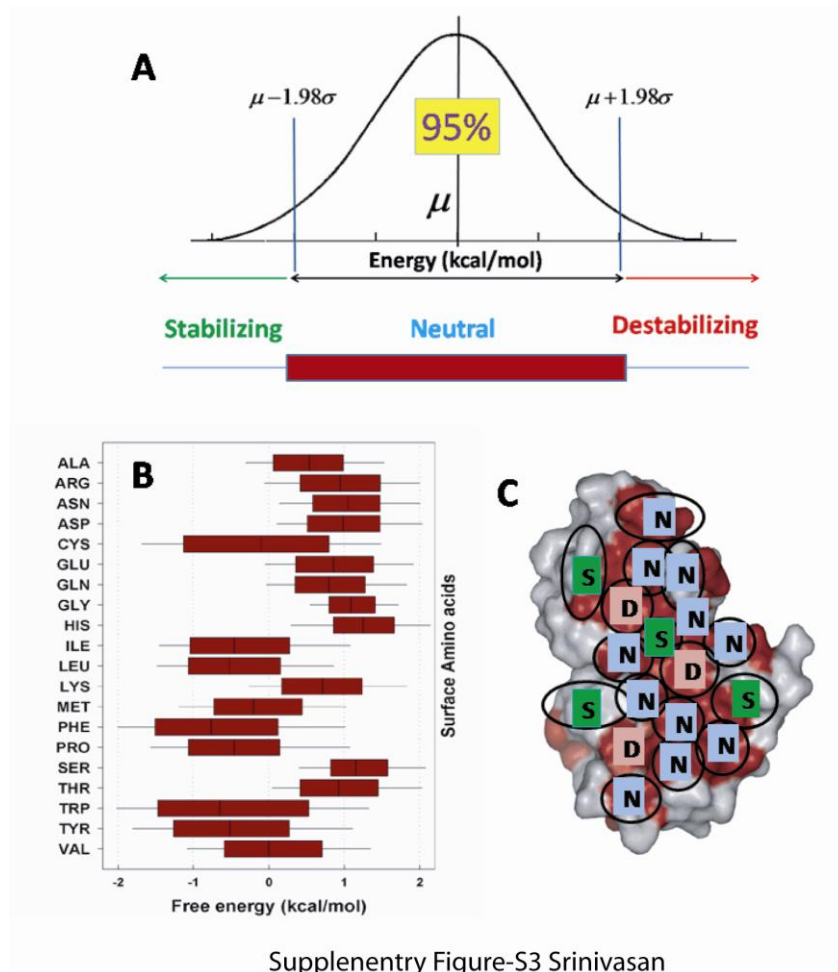

Supplementary Figure-S3 Srinivasan

### Supplementary Figure S3

#### **Schematic representation of classification of domain-domain interfacial residues. a.**

Computation of distribution of the free energy contribution of a typical surface residue of a single residue type. e.g. Alanine Showing the cutoff limits for the classification into the three categories. **b.** The computation of the distribution parameters ( $\mu$  and s.d.) for all the 20 amino acids. The red bar shows the neutral zone with the mean at the center for the free energy contribution of surface residues. The lines extending the distribution are beyond the 95% confidence limits. **c.** Each interfacial residue from the MD\_doms dataset was compared against the B and classified into one of the three categories. Shown is a representative example of interface of domain-1 of the BhpC enzyme. The Stabilizing residues are marked by the green squares with "S", the neutral residues are marked by blue squares with "N" and the destabilizing residues are marked by light red squares with "D".

Computation of distribution of the free energy contribution of a typical surface residue of a single residue type. e.g. Alanine Showing the cutoff limits for the classification into the three categories. **b.** The computation of the distribution parameters ( $\mu$  and s.d.) for all the 20 amino acids. The red bar shows the neutral zone with the mean at the center for the free energy contribution of surface residues. The lines extending the distribution are beyond the 95% confidence limits. **c.** Each interfacial residue from the MD\_doms dataset was compared against the B and classified into one of the three categories. Shown is a representative example of interface of domain-1 of the BhpC enzyme. The Stabilizing residues are marked by the green squares with "S", the neutral residues are marked by blue squares with "N" and the destabilizing residues are marked by light red squares with "D".

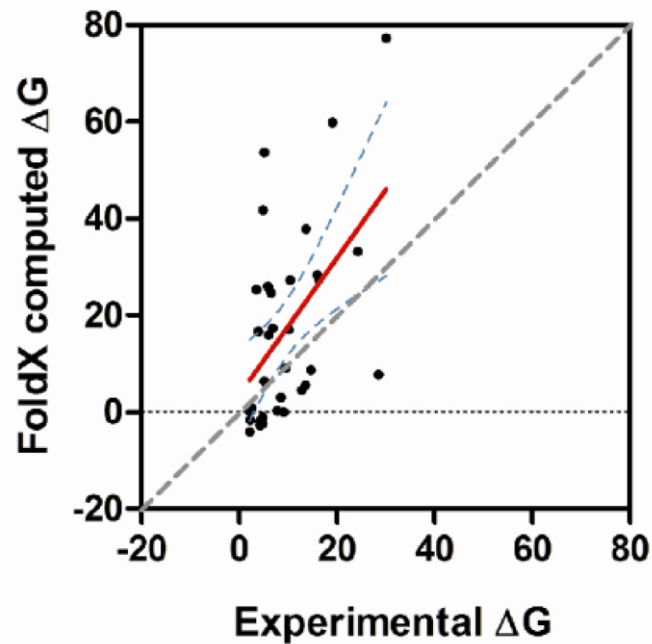

Supplementary Figure-S4 Srinivasan

#### Supplementary Figure S4

**Benchmarking FoldX computations.** Correlation between experimentally determined and FoldX computed free energies of unfolding for a set of 35 proteins. Spearman rank correlation  $r = 0.5679$ ;  $P = 0.0004$ . Red line represents best fit by linear regression. Blue dashed line indicates the 95% confidence limit. These proteins were selected as they were monomeric and showed two state unfolding at 298K and pH 7.0. The experimental unfolding free energies were obtained from Protherm database. The correlation shows that the FoldX computed values cannot be taken as absolute but are good for relative comparisons.

### Supplementary Table S1 Srinivasan.

**Supplementary Table S1. Natural variations (nsSNPs ;  $n = 33$ ) in the interfaces of multi-domain proteins.** The following table lists the nsSNPs found in the domain-domain interface of human proteins ( $n = 14$ ). The improper functioning of these proteins have been implicated in various disease states. The effect of the nsSNP on the stability of the protein is computed by modelling the structure of the variant amino-acid and computing the  $\Delta\Delta G$  using FoldX. The relative conservation of the site, the solvent accessibility and the functional relevance (Ligand binding) are also provided. The direct involvement of the nsSNP ( $n = 9$ ) in producing a non-functional protein and leading to disease state is shown by referring to pubmed id (PMID). The bold SNPs refer to change of a non-polar interfacial residue to a polar residue. The bold  $\Delta\Delta G$  values ( $>1$  kcal/mol) correspond to considerable destabilization of the structure to affect function. Note that the SNPs at residues participating in stabilization of the interface (See Supplementary Fig. S3online) lead to a larger destabilization effect.

| Protein                                  | PDB  | SNPdb id   | SNP   | Solv Ac (%) | Conservation (%) | $\Delta\Delta G$ (kcal/mol) | Ligand Binding | nsSNP Validation | Diseases associated with /PMID         |
|------------------------------------------|------|------------|-------|-------------|------------------|-----------------------------|----------------|------------------|----------------------------------------|
| hematopoietic prostaglandin D synthase   | 1iyh | rs56161897 | F151L | 0           | 0.16             | <b>1.55</b>                 | ---            | ----             | Delayed type hypersensitivity          |
| immunoglobulin lambda-like polypeptide 1 | 1l6x | rs11557948 | Y436C | 0.19        | 0.01             | <b>1.25</b>                 | ---            | ----             | Agammaglobulinemia 2                   |
| immunoglobulin lambda-like polypeptide 1 | 1l6x | rs15893    | E430K | 0.15        | 0.18             | -1.47                       | ---            | ----             | Agammaglobulinemia 2                   |
| sex comb on midleg-like 2 (Drosophila)   | 1oi1 | rs73454384 | I224V | 0           | 0.66             | 0.83                        | ---            | ----             | Nil                                    |
| tocopherol (alpha)                       | 1oip | rs28936369 | R192H | 0.31        | 0.12             | -0.5                        | ---            | 8602747          | Ataxia, Friedreich-like, with Isolated |

|                                         |      |            |               |      |      |              |     |                            |                                                 |
|-----------------------------------------|------|------------|---------------|------|------|--------------|-----|----------------------------|-------------------------------------------------|
| transfer protein                        |      |            |               |      |      |              |     | (1)                        | vitamin E deficiency                            |
| FK506 binding protein 4                 | 1q1c | rs1062478  | R157H         | 0.42 | 0.51 | -0.09        | --- | ----                       | Associated with Refsum disease                  |
| acyl-CoA dehydrogenase family, member 8 | 1rx0 | rs11550637 | F87L          | 0    | 0.33 | <b>1.35</b>  | --- | ----                       | isobutyryl-CoA dehydrogenase (IBD) deficiency   |
| acyl-CoA dehydrogenase family, member 8 | 1rx0 | rs7483314  | L375V         | 0.28 | 0.07 | <b>1.02</b>  | FAD | ----                       | isobutyryl-CoA dehydrogenase (IBD) deficiency   |
| breast cancer 1, early onset            | 1t15 | rs1800757  | <b>P1776S</b> | 0.54 | 0.15 | <b>1.1</b>   | --- | 17063491 (2), 17719744 (3) | Breast-Ovarian cancer, familial, susceptibility |
| breast cancer 1, early onset            | 1t15 | rs28897696 | <b>A1708E</b> | 0    | 0.19 | <b>11.56</b> | --- | 17063491 (2), 17719744 (3) | Breast-Ovarian cancer, familial, susceptibility |
| breast cancer 1, early onset            | 1t15 | rs41293459 | <b>R1699Q</b> | 0    | 0.11 | <b>2.09</b>  | --- | 17719744 (3)               | Breast-Ovarian cancer, familial, susceptibility |
| breast cancer 1, early onset            | 1t15 | rs41293463 | <b>M1775R</b> | 0.02 | 0.21 | <b>4.41</b>  | --- | 17063491 (2), 17719744 (3) | Breast-Ovarian cancer, familial, susceptibility |
| breast cancer 1, early onset            | 1t15 | rs55770810 | <b>R1669W</b> | 0    | 0.11 | <b>2.65</b>  | --- | 17719744 (3)               | Breast-Ovarian cancer, familial, susceptibility |
| breast cancer 1, early onset            | 1t15 | rs55808233 | <b>M1783T</b> | 0    | 0.41 | <b>4.01</b>  | --- | 17719744                   | Breast-Ovarian cancer, familial,                |

| onset                                                |      |            |             |      |      |             | (3) | suseptibility  |                                                 |
|------------------------------------------------------|------|------------|-------------|------|------|-------------|-----|----------------|-------------------------------------------------|
| polo-like kinase 1<br>(Drosophila)                   | 1umw | rs34359215 | R581C       | 0.47 | 0.33 | 0.45        | --- | ----           | Cell cycle regulation and Cancer                |
| polo-like kinase 1<br>(Drosophila)                   | 1umw | rs35347525 | R441H       | 0.19 | 0.41 | <b>1.61</b> | --- | ----           | Cell cycle regulation and Cancer                |
| glutathione S-<br>transferase omega 1                | 1eem | rs11509436 | S86C        | 0.04 | 0.05 | -0.34       | GSH | ----           | Cancer, Xenobiotics                             |
| glutathione S-<br>transferase omega 1                | 1eem | rs11509439 | A236V       | 0    | 0.01 | <b>4.85</b> | --- | ----           | Cancer, Xenobiotics                             |
| glutathione S-<br>transferase omega 1                | 1eem | rs15032    | T217N       | 0.24 | 0.03 | 0.12        | --- | ----           | Cancer, Xenobiotics                             |
| glutathione S-<br>transferase omega 1                | 1eem | rs45529437 | <b>C32Y</b> | 0.11 | 0.18 | -1.06       | GSH | ----           | Cancer, Xenobiotics                             |
| glutathione S-<br>transferase omega 1                | 1eem | rs72559704 | R7K         | 0.58 | 0    | -0.08       | --- | ----           | Cancer, Xenobiotics                             |
| hydroxyacyl-CoA<br>dehydrogenase                     | 1f0y | rs1051519  | Q140H       | 0.53 | 0.09 | 0.48        | --- | ----           | Hyperinsulinemic Hypoglycemia,<br>familial      |
| Fc fragment-IgG,low<br>affinity<br>IIa,recep(CD32)   | 1fcg | rs4986941  | M107V       | 0.54 | 0.18 | 0.54        | --- | ----           | Lupus Nephritis                                 |
| Fc fragment-IgG,low<br>affinity<br>IIIb,recep(CD16b) | 1fnl | rs2290834  | I88V        | 0.72 | 0.63 | 0.2         | --- | ----           | Susseptibility to recurrent viral<br>infections |
| Fc fragment-IgG,low<br>affinity                      | 1fnl | rs403016   | S18R        | 0.02 | 0.04 | -1.9        | --- | 2478590<br>(4) | Lupus Nephritis, Inflammatory Bowel<br>Disease  |



| IIIb,recep(CD16b)                 |      |            |              |      |      |             |     |             |                                                             |
|-----------------------------------|------|------------|--------------|------|------|-------------|-----|-------------|-------------------------------------------------------------|
| glutathione S-transferase alpha 1 | 1gse | rs1051558  | <b>F10S</b>  | 0.07 | 0.25 | <b>1.89</b> | EAA | ----        | Warfarin sensitivity                                        |
| glutathione S-transferase alpha 1 | 1gse | rs1051566  | <b>A12T</b>  | 0.08 | 0.06 | 0.95        | EAA | ----        | Warfarin sensitivity                                        |
| glutathione S-transferase alpha 1 | 1gse | rs1051573  | A12V         | 0.08 | 0.06 | <b>1.26</b> | EAA | ----        | Warfarin sensitivity                                        |
| glutathione S-transferase alpha 1 | 1gse | rs1051983  | <b>A216S</b> | 0.02 | 0.02 | 0.67        | EAA | ----        | Warfarin sensitivity                                        |
| glutathione S-transferase alpha 1 | 1gse | rs1131849  | R89K         | 0.08 | 0.43 | -0.27       | --- | ----        | Warfarin sensitivity                                        |
| glutathione S-transferase pi 1    | 11gs | rs45549733 | R186W        | 0.29 | 0.14 | 0.74        | --- | ----        | Chemotherapy-induced carcinogenesis, acute myeloid leukemia |
| glutathione S-transferase pi 1    | 11gs | rs1695     | I104V        | 0.28 | 0.1  | 0.76        | EAA | 9092542 (5) | Cancer, Xenobiotics                                         |
| glutathione S-transferase pi 1    | 11gs | rs71534294 | D157H        | 0.02 | 0.35 | -0.18       | --- | ----        | Cancer, Xenobiotics                                         |

**Supplementary Datasets:****Datasets used in the current analysis of Single and Multi-domain proteins.**MD\_doms (856) : Astral domains of Multi-domain proteins; *SCOP version 1.75*

d11gsa1, d11gsa2, d1a4ib1, d1a4ib2, d1a8d\_1, d1a8d\_2, d1a8h\_1, d1a8h\_2, d1a8l\_1, d1a8l\_2, d1a8p\_1, d1a8p\_2, d1abwa1, d1abwa2, d1af0a1, d1af0a2, d1af7\_1, d1af7\_2, d1afa11, d1afa12, d1afwb1, d1afwb2, d1akl\_1, d1akl\_2, d1amm\_1, d1amm\_2, d1aqh\_1, d1aqh\_2, d1aqk11, d1aqk12, d1avaa1, d1avaa2, d1aw7a1, d1aw7a2, d1b0na1, d1b0na2, d1b1ba1, d1b1ba2, d1b2ra1, d1b2ra2, d1b3bc1, d1b3bc2, d1b43a1, d1b43a2, d1b71a1, d1b71a2, d1b8aa1, d1b8aa2, d1b8pa1, d1b8pa2, d1b9ka1, d1b9ka2, d1b9wa1, d1b9wa2, d1bg0\_1, d1bg0\_2, d1bgva1, d1bgva2, d1bh1a1, d1bh1a2, d1bif\_1, d1bif\_2, d1bli\_1, d1bli\_2, d1bqub1, d1bqub2, d1bw9a1, d1bw9a2, d1c1aa1, d1c1aa2, d1c1e11, d1c1e12, d1c2aa1, d1c2aa2, d1c5ka1, d1c5ka2, d1c8ua1, d1c8ua2, d1c9ya1, d1c9ya2, d1ca1\_1, d1ca1\_2, d1cb6a1, d1cb6a2, d1ccza1, d1ccza2, d1cdy\_1, d1cdy\_2, d1cf9a1, d1cf9a2, d1cfb\_1, d1cfb\_2, d1chma1, d1chma2, d1cjd1, d1cjd2, d1clc\_1, d1clc\_2, d1coja1, d1coja2, d1cpo\_1, d1cpo\_2, d1cuna1, d1cuna2, d1cvra1, d1cvra2, d1czya1, d1czya2, d1d2oa1, d1d2oa2, d1dd3a1, d1dd3a2, d1dfx\_1, d1dfx\_2, d1dhka1, d1dhka2, d1dkxa1, d1dkxa2, d1d15a1, d1d15a2, d1dmr\_1, d1dmr\_2, d1duga1, d1duga2, d1duvg1, d1duvg2, d1duza1, d1duza2, d1dvpa1, d1dvpa2, d1dxrh1, d1dxrh2, d1dyka1, d1dyka2, d1dyqa1, d1dyqa2, d1dzfa1, d1dzfa2, d1e1ca1, d1e1ca2, d1e1cb1, d1e1cb2, d1e3oc1, d1e3oc2, d1e42a1, d1e42a2, d1e5ta1, d1e5ta2, d1e71a1, d1e71a2, d1eara1, d1eara2, d1eb0a1, d1eb0a2, d1ebha1, d1ebha2, d1ec9d1, d1ec9d2, d1ecfa1, d1ecfa2, d1ecfb1, d1ecfb2, d1edha1, d1edha2, d1eeja1, d1eeja2, d1eema1, d1eema2, d1eerb1, d1eerb2, d1eg9a1, d1eg9a2, d1ehda1, d1ehda2, d1eila1, d1eila2, d1ek4a1, d1ek4a2, d1ekxa1, d1ekxa2, d1emd\_1, d1emd\_2, d1enfa1, d1enfa2, d1epfa1, d1epfa2, d1epfb1, d1epfb2, d1es1\_1, d1es1\_2, d1eu3a1, d1eu3a2, d1evka1, d1evka2, d1ewca1, d1ewca2, d1ewfa1, d1ewfa2, d1f0ya1, d1f0ya2, d1f1bb1, d1f1bb2, d1f1ha1, d1f1ha2, d1f1ra1, d1f1ra2, d1f1ua1, d1f1ua2, d1f20a1, d1f20a2, d1f8ab1, d1f8ab2, d1fcga1, d1fcga2, d1fnla1, d1fnla2, d1fnua1, d1fnua2, d1fp2a1, d1fp2a2, d1fpoa1, d1fpoa2, d1ftra1, d1ftra2, d1fv1b1, d1fv1b2, d1fw1a1, d1fw1a2, d1fx1a1, d1fx1a2, d1g1qa1, d1g1qa2, d1g38a1, d1g38a2, d1g5aa1, d1g5aa2, d1g61a1, d1g61a2, d1g87b1, d1g87b2, d1g8ka1, d1g8ka2, d1g97a1, d1g97a2, d1giqa1, d1giqa2, d1g14a1, d1g14a2, d1glpa1, d1glpa2, d1gmua1, d1gmua2, d1gmuc1, d1gmuc2, d1gqia1, d1gqia2, d1gqza1, d1gqza2, d1gsa\_1, d1gsa\_2, d1gsea1, d1gsea2, d1gsma1, d1gsma2, d1gupa1, d1gupa2, d1gv2a1, d1gv2a2, d1gv3a1, d1gv3a2, d1h03p1, d1h03p2, d1h1oa1, d1h1oa2, d1h1pb1, d1h1pb2, d1h6ta1, d1h6ta2, d1h72c1, d1h72c2, d1h8pa1, d1h8pa2, d1h9ra1, d1h9ra2, d1hbmb1, d1hbmb2, d1hf8a1, d1hf8a2, d1hfe11, d1hfe12, d1hm9a1, d1hm9a2, d1hna\_1, d1hna\_2, d1hpua1, d1hpua2, d1ht6a1, d1ht6a2, d1hw1a1, d1hw1a2, d1hw5a1, d1hw5a2, d1hx6b1, d1hx6b2, d1hyob1, d1hyob2, d1ilaa1, d1ilaa2, d1ilga1, d1ilga2, d1i7na1, d1i7na2, d1i7pa1, d1i7pa2, d1i8da1, d1i8da2, d1ig0a1, d1ig0a2, d1ig0b1, d1ig0b2, d1ig3a1, d1ig3a2, d1ihga1, d1ihga2, d1ii2a1, d1ii2a2, d1iow\_1, d1iow\_2, d1liqa1, d1liqa2, d1liza1, d1liza2, d1litkb1, d1litkb2, d1iyha1, d1iyha2, d1liz4a1, d1liz4a2, d1liz6a1, d1liz6a2, d1liz9a1, d1liz9a2, d1j09a1, d1j09a2,

dlj11a1, dlj11a2, dlj3na1, dlj3na2, dlj8mf1, dlj8mf2, dljaka1, dljaka2,  
 dljdc\_1, dljdc\_2, dljfla1, dljfla2, dljhda1, dljhda2, dljhfa1, dljhfa2,  
 dljlva1, dljlva2, dljpna1, dljpna2, dljs1x1, dljs1x2, dljs4a1, dljs4a2,  
 dlju3a1, dlju3a2, dlk0ma1, dlk0ma2, dlk0mb1, dlk0mb2, dlk8kd1, dlk8kd2,  
 dlk8wa3, dlk8wa5, dlk92a1, dlk92a2, dlkbva1, dlkbva2, dlkhia1, dlkhia2,  
 dlkkcx1, dlkkcx2, dlklua1, dlklua2, dlklub1, dlklub2, dlkqfb1, dlkqfb2,  
 dlks9a1, dlks9a2, dlktba1, dlktba2, dlkv9a1, dlkv9a2, dlkwma1, dlkwma2,  
 dlky6a1, dlky6a2, dlkzqa1, dlkzqa2, dl11fb1, dl11fb2, dl113ka1, dl113ka2,  
 dl113sa1, dl113sa2, dl116xa1, dl116xa2, dl117ra1, dl117ra2, dl1lam\_1, dl1lam\_2,  
 dl1lara1, dl1lara2, dl1bu\_1, dl1bu\_2, dl1li1a1, dl1li1a2, dl1lda1, dl1lda2,  
 dl1lr7a1, dl1lr7a2, dl1sla1, dl1sla2, dl1lu9a1, dl1lu9a2, dl1ly2a1, dl1ly2a2,  
 dl1m0ua1, dl1m0ua2, dl1m1je1, dl1m1je2, dl1m1kg1, dl1m1kg2, dl1m1ta1, dl1m1ta2,  
 dl1m2tb1, dl1m2tb2, dl1m3ya1, dl1m3ya2, dl1m5ha1, dl1m5ha2, dl1m6za1, dl1m6za2,  
 dl1mdl\_1, dl1mdl\_2, dl1mgta1, dl1mgta2, dl1mixa1, dl1mixa2, dl1mla1, dl1mla2,  
 dl1mp9a1, dl1mp9a2, dl1mpga1, dl1mpga2, dl1ms5a1, dl1ms5a2, dl1mxda1, dl1mxda2,  
 dl1mzya1, dl1mzya2, dl1nlea1, dl1nlea2, dl1nlic1, dl1nlic2, dl1nlsa1, dl1nlsa2,  
 dl1n2aa1, dl1n2aa2, dl1n5wa1, dl1n5wa2, dl1n5wb1, dl1n5wb2, dl1n5wc1, dl1n5wc2,  
 dl1n63b1, dl1n63b2, dl1n67a1, dl1n67a2, dl1ne9a1, dl1ne9a2, dl1nija1, dl1nija2,  
 dl1nkr\_1, dl1nkr\_2, dl1nm8a1, dl1nm8a2, dl1np3a1, dl1np3a2, dl1np7a1, dl1np7a2,  
 dl1npya1, dl1npya2, dl1npyb1, dl1npyb2, dl1nr0a1, dl1nr0a2, dl1ntya1, dl1ntya2,  
 dl1nu5a1, dl1nu5a2, dl1nvma1, dl1nvma2, dl1nyta1, dl1nyta2, dl1nzoa1, dl1nzoa2,  
 dl1o0sa1, dl1o0sa2, dl1o0wa1, dl1o0wa2, dl1o0wb1, dl1o0wb2, dl1o50a1, dl1o50a2,  
 dl1o6va1, dl1o6va2, dl1o7ga1, dl1o7ga2, dl1o97d1, dl1o97d2, dl1obba1, dl1obba2,  
 dl1obzb1, dl1obzb2, dl1oe7a1, dl1oe7a2, dl1oe8b1, dl1oe8b2, dl1ogad1, dl1ogad2,  
 dl1ogae1, dl1ogae2, dl1ogmx1, dl1ogmx2, dl1oi1a1, dl1oi1a2, dl1oipa1, dl1oipa2,  
 dl1oiza1, dl1oiza2, dl1okta1, dl1okta2, dl1olla1, dl1olla2, dl1on2a1, dl1on2a2,  
 dl1on3a1, dl1on3a2, dl1on3e1, dl1on3e2, dl1ooya1, dl1ooya2, dl1ooyb1, dl1ooyb2,  
 dl1or7a1, dl1or7a2, dl1or7b1, dl1or7b2, dl1orb\_1, dl1orb\_2, dl1osp11, dl1osp12,  
 dl1ov3a1, dl1ov3a2, dl1ovna1, dl1ovna2, dl1ovnb1, dl1ovnb2, dl1owla1, dl1owla2,  
 dl1oxja1, dl1oxja2, dl1oxsc1, dl1oxsc2, dl1oxva1, dl1oxva2, dl1p1da1, dl1p1da2,  
 dl1pfqa1, dl1pfqa2, dl1pgs\_1, dl1pgs\_2, dl1pii\_1, dl1pii\_2, dl1pina1, dl1pina2,  
 dl1pn9a1, dl1pn9a2, dl1pnf\_1, dl1pnf\_2, dl1pprm1, dl1pprm2, dl1puoa1, dl1puoa2,  
 dl1puob1, dl1puob2, dl1q16a1, dl1q16a2, dl1q1ba1, dl1q1ba2, dl1q1ca1, dl1q1ca2,  
 dl1q1pa1, dl1q1pa2, dl1q4ga1, dl1q4ga2, dl1q7za1, dl1q7za2, dl1qd1b1, dl1qd1b2,  
 dl1qh4a1, dl1qh4a2, dl1qksa1, dl1qksa2, dl1qmga1, dl1qmga2, dl1qneb1, dl1qneb2,  
 dl1qnf\_1, dl1qnf\_2, dl1qnna1, dl1qnna2, dl1qr0a1, dl1qr0a2, dl1qsaa1, dl1qsaa2,  
 dl1qxma1, dl1qxma2, dl1qyab1, dl1qyab2, dl1r17a1, dl1r17a2, dl1r27a1, dl1r27a2,  
 dl1r4sa1, dl1r4sa2, dl1rc9a1, dl1rc9a2, dl1reqd1, dl1reqd2, dl1rj9a1, dl1rj9a2,  
 dl1rjya1, dl1rjya2, dl1rl6a1, dl1rl6a2, dl1rm6a1, dl1rm6a2, dl1rm6b1, dl1rm6b2,  
 dl1rqpa1, dl1rqpa2, dl1rrha1, dl1rrha2, dl1rwza1, dl1rwza2, dl1rx0a1, dl1rx0a2,  
 dl1rxza1, dl1rxza2, dl1rzhh1, dl1rzhh2, dl1rzpc1, dl1rzpc2, dl1sdwa1, dl1sdwa2,  
 dl1se4\_1, dl1se4\_2, dl1sgma1, dl1sgma2, dl1sh5a1, dl1sh5a2, dl1sjda1, dl1sjda2,  
 dl1sjdb1, dl1sjdb2, dl1skz\_1, dl1skz\_2, dl1sli\_1, dl1sli\_2, dl1sqga1, dl1sqga2,  
 dl1st0a1, dl1st0a2, dl1svb\_1, dl1svb\_2, dl1szna1, dl1szna2, dl1t0fa1, dl1t0fa2,  
 dl1t15a1, dl1t15a2, dl1tlea1, dl1tlea2, dl1t3qa1, dl1t3qa2, dl1t3qb1, dl1t3qb2,  
 dl1t3qc1, dl1t3qc2, dl1t56a1, dl1t56a2, dl1t6ca1, dl1t6ca2, dl1t6ka1, dl1t6ka2,  
 dl1t6sa1, dl1t6sa2, dl1t7va1, dl1t7va2, dl1ti6a1, dl1ti6a2, dl1ti6b1, dl1ti6b2,  
 dl1tjea1, dl1tjea2, dl1tjg11, dl1tjg12, dl1tjla1, dl1tjla2, dl1tola1, dl1tola2,  
 dl1tqya1, dl1tqya2, dl1tqyb1, dl1tqyb2, dl1tuaa1, dl1tuaa2, dl1tvfa1, dl1tvfa2,

dltxga1, dltxga2, dltty0a1, dltty0a2, dlu00a1, dlu00a2, dlu0va1, dlu0va2, dlu2ca1, dlu2ca2, dlu3ca1, dlu3ca2, dlu5pa1, dlu5pa2, dlu8va1, dlu8va2, dluasa1, dluasa2, dlud9a1, dlud9a2, dlueka1, dlueka2, dlumdb1, dlumdb2, dlumwa1, dlumwa2, dluok\_1, dluok\_2, dlupsa1, dlupsa2, dluvqa1, dluvqa2, dluxga1, dluxga2, dluxy\_1, dluxy\_2, dluypa1, dluypa2, dlv0ea1, dlv0ea2, dlvloa1, dlvloa2, dlv2aa1, dlv2aa2, dlv54b1, dlv54b2, dlv57a1, dlv57a2, dlv5va1, dlv5va2, dlv6wa1, dlv6wa2, dlv8ca1, dlv8ca2, dlvcaa1, dlvcaa2, dlvin\_1, dlvin\_2, dlvmaa1, dlvmaa2, dlvzia1, dlvzia2, dlvzya1, dlvzya2, dlw5fa1, dlw5fa2, dlwd3a1, dlwd3a2, dlwejh1, dlwejh2, dlwf3a1, dlwf3a2, dlwmda1, dlwmda2, dlwopa1, dlwopa2, dlwoqa1, dlwoqa2, dlwpcal, dlwpcal, dlxjva1, dlxjva2, dlxo0a1, dlxo0a2, dlxqha1, dlxqha2, dlxsza1, dlxsza2, dlxtia1, dlxtia2, dlxuua1, dlxuua2, dly4wa1, dly4wa2, dly88a1, dly88a2, d2eifa1, d2eifa2, d2fbjh1, d2fbjh2, d2g3pa1, d2g3pa2, d2napa1, d2napa2, d2pgd\_1, d2pgd\_2, d2pspa1, d2pspa2, d3hada1, d3hada2, d3hsc\_1, d3hsc\_2, d5r1ra1, d5r1ra2, d6ldh\_1, d6ldh\_2, d7acn\_1, d7acn\_2, d7taa\_1, d7taa\_2.

**MD\_chains (428) :** Multi-domain proteins each containing 2 domains, along with the chain identifier at the end of the *PDB* code.

1lgsa, 1a4ib, 1a8d\_, 1a8h\_, 1a8l\_, 1a8p\_, 1abwa, 1af0a, 1af7\_, 1afa1, 1afwb, 1akl\_, 1amm\_, 1aqh\_, 1aqkl, 1avaa, 1aw7a, 1b0na, 1b1ba, 1b2ra, 1b3bc, 1b43a, 1b71a, 1b8aa, 1b8pa, 1b9ka, 1b9wa, 1bg0\_, 1bgva, 1bhata, 1bif\_, 1bli\_, 1bqub, 1bw9a, 1claa, 1clel, 1c2aa, 1c5ka, 1c8ua, 1c9ya, 1ca1\_, 1cb6a, 1ccza, 1cdy\_, 1cf9a, 1cfb\_, 1chma, 1cjdb, 1clc\_, 1coja, 1cpo\_, 1cuna, 1cvra, 1czya, 1d2oa, 1dd3a, 1dfx\_, 1dhka, 1dkxa, 1dl5a, 1dmr\_, 1duga, 1duvg, 1duza, 1dvpa, 1dxrh, 1dyka, 1dyqa, 1dzfa, 1elca, 1elcb, 1e3oc, 1e42a, 1e5ta, 1e7la, 1eara, 1eb0a, 1ebha, 1ec9d, 1ecfa, 1ecfb, 1edha, 1eeja, 1eema, 1eerb, 1eg9a, 1ehda, 1eila, 1ek4a, 1ekxa, 1emd\_, 1enfa, 1epfa, 1epfb, 1esl\_, 1eu3a, 1evka, 1ewca, 1ewfa, 1f0ya, 1f1bb, 1f1ha, 1f1ra, 1f1ua, 1f20a, 1f8ab, 1fcga, 1fnla, 1fnua, 1fp2a, 1fpoa, 1ftra, 1fv1b, 1fw1a, 1fxla, 1g1qa, 1g38a, 1g5aa, 1g6la, 1g87b, 1g8ka, 1g97a, 1giqa, 1gl4a, 1glpa, 1gmua, 1gmuc, 1gqia, 1gqza, 1gsa\_, 1gsea, 1gsma, 1gupa, 1gv2a, 1gv3a, 1h03p, 1h1oa, 1h1pb, 1h6ta, 1h72c, 1h8pa, 1h9ra, 1hbmb, 1hf8a, 1hfel, 1hm9a, 1hna\_, 1hpua, 1ht6a, 1hw1a, 1hw5a, 1hx6b, 1hyob, 1ilaa, 1ilga, 1i7na, 1i7pa, 1i8da, 1ig0a, 1ig0b, 1ig3a, 1ihga, 1ii2a, 1iow\_, 1iqca, 1isza, 1itkb, 1iyha, 1iz4a, 1iz6a, 1iz9a, 1j09a, 1j11a, 1j3na, 1j8mf, 1jaka, 1jdc\_, 1jfla, 1jhda, 1jhfa, 1jlv, 1jpna, 1js1x, 1js4a, 1ju3a, 1k0ma, 1k0mb, 1k8kd, 1k8wa, 1k92a, 1kbva, 1khia, 1kkcx, 1klua, 1klub, 1kqfb, 1ks9a, 1ktba, 1kv9a, 1kwma, 1ky6a, 1kzqa, 1l1fb, 1l3ka, 1l3sa, 1l6xa, 1l7ra, 1lam\_, 1lara, 1lbu\_, 1lila, 1llda, 1lr7a, 1lsla, 1lu9a, 1ly2a, 1m0ua, 1mlje, 1mlkg, 1mlta, 1m2tb, 1m3ya, 1m5ha, 1m6za, 1mdl\_, 1mgta, 1mixa, 1mla, 1mp9a, 1mpga, 1ms5a, 1mxda, 1mzya, 1nlea, 1nlic, 1nlsa, 1n2aa, 1n5wa, 1n5wb, 1n5wc, 1n63b, 1n67a, 1ne9a, 1nija, 1nkr\_, 1nm8a, 1np3a, 1np7a, 1npya, 1npyb, 1nr0a, 1ntya, 1nu5a, 1nvma, 1nyta, 1nzoa, 1o0sa, 1o0wa, 1o0wb, 1o50a, 1o6va, 1o7ga, 1o97d, 1obba, 1obzb, 1oe7a, 1oe8b, 1ogad, 1ogae, 1ogmx, 1oila, 1oipa, 1oiza, 1okta, 1olla, 1on2a, 1on3a, 1on3e, 1ooya, 1ooyb, 1or7a, 1or7b, 1orb\_, 1ospl, 1ov3a, 1ovna, 1ovnb, 1owla, 1oxja, 1oxsc, 1oxva, 1p1da, 1pfqa, 1pgs\_, 1pii\_, 1pina, 1pn9a, 1pnf\_, 1pprm, 1puoa, 1puob, 1q16a, 1q1ba, 1q1ca, 1q1pa, 1q4ga, 1q7za, 1qdlb, 1qh4a, 1qksa, 1qnga, 1qneb, 1qnf\_, 1qnna, 1qr0a, 1qsaa, 1quma, 1qyab, 1r17a, 1r27a, 1r4sa, 1rc9a, 1reqd, 1rj9a, 1rjya, 1rl6a, 1rm6a, 1rm6b, 1rqpa, 1rrha, 1rwza, 1rx0a, 1rxza, 1rzhh, 1rzpc, 1sdwa, 1se4\_, 1sgma, 1sh5a, 1sjda, 1sjdb,

1skz\_, 1sli\_, 1sqga, 1st0a, 1svb\_, 1szna, 1t0fa, 1t15a, 1tlea, 1t3qa, 1t3qb,  
 1t3qc, 1t56a, 1t6ca, 1t6ka, 1t6sa, 1t7va, 1ti6a, 1ti6b, 1tjea, 1tjgl, 1tjla,  
 1tola, 1tqya, 1tqyb, 1tuaa, 1tvfa, 1txga, 1ty0a, 1u00a, 1u0va, 1u2ca, 1u3ca,  
 1u5pa, 1u8va, 1uasa, 1ud9a, 1ueka, 1umdb, 1umwa, 1uok\_, 1upsa, 1uvqa, 1uxga,  
 1uxy\_, 1uypa, 1v0ea, 1vloa, 1v2aa, 1v54b, 1v57a, 1v5va, 1v6wa, 1v8ca, 1vcaa,  
 1vin\_, 1vmaa, 1vzia, 1vzya, 1w5fa, 1wd3a, 1wejh, 1wf3a, 1wmda, 1wopa, 1woqa,  
 1wpc, 1xjva, 1xo0a, 1xqha, 1xsza, 1xtia, 1xuua, 1y4wa, 1y88a, 2eifa, 2fbjh,  
 2g3pa, 2napa, 2pgd\_, 2pspa, 3hada, 3hsc\_, 5r1ra, 6ldh\_, 7acn\_, 7taa\_.

**1D\_homs (261) :** Single domain Homologues of MD\_doms; belong to the same SCOP class, but exist independently.

d101m\_, d1a4ra\_, d1a53\_, d1aa2\_, d1abq\_, d1ae9a\_, d1aera\_,  
 d1ah7\_, d1alq\_, d1ame\_, d1aohb\_, d1arl\_, d1axb\_, d1b07a\_,  
 d1b0b\_, d1b0ua\_, d1b13a\_, d1b1ya\_, d1b6e\_, d1b88a\_, d1bb9\_,  
 d1bd7a\_, d1bfea\_, d1bg4\_, d1bjre\_, d1bmg\_, d1bqca\_, d1btn\_,  
 d1c4rg\_, d1c7za\_, d1cef\_, d1cem\_, d1cen\_, d1cfwa\_, d1ci8a\_,  
 d1cska\_, d1cwy\_, d1cyw\_, d1d0ba\_, d1d0la\_, d1d8ua\_, d1dil\_,  
 d1d13b\_, d1dm1a\_, d1dsl\_, d1dtja\_, d1dtp\_, d1dv8a\_, d1dy6a\_,  
 d1dypa\_, d1e5ja\_, d1e8tb\_, d1ea7a\_, d1eaza\_, d1eca\_, d1ecea\_,  
 d1edg\_, d1edmb\_, d1eeub\_, d1egza\_, d1ek0a\_, d1elka\_, d1erjc\_,  
 d1eur\_, d1f0ma\_, d1f3oa\_, d1f5oa\_, d1f6bb\_, d1f8ca\_, d1foa\_,  
 d1fgya\_, d1fhla\_, d1fica\_, d1fm5a\_, d1fna\_, d1fpra\_, d1fuka\_,  
 d1fxxa\_, d1fyna\_, d1g1ca\_, d1g24a\_, d1g43a\_, d1g68a\_, d1g6ha\_,  
 d1g9oa\_, d1ga0a\_, d1gbg\_, d1gcpb\_, d1geqb\_, d1ghsa\_, d1gv5a\_,  
 d1gwna\_, d1gz2a\_, d1h12a\_, d1h1na\_, d1h31b\_, d1h4pa\_, d1h97a\_,  
 d1hbg\_, d1hh8a\_, d1hiza\_, d1hkfa\_, d1h1b\_, d1hpt\_, d1hq8a\_,  
 d1hura\_, d1hxia\_, d1i1ja\_, d1i1na\_, d1i3va\_, d1i4na\_, d1i71a\_,  
 d1i94l\_, d1i94q\_, d1i9ea\_, d1ia7a\_, d1iona\_, d1iq7a\_, d1itha\_,  
 d1j2aa\_, d1j53a\_, d1jc9a\_, d1jfm\_, d1jg1a\_, d1jhea\_, d1ji0a\_,  
 d1jj7a\_, d1jlna\_, d1jo8a\_, d1jqqb\_, d1jvwa\_, d1k38a\_, d1k9ba\_,  
 d1k9id\_, d1kawa\_, d1kdka\_, d1knma\_, d1ks8a\_, d1kula\_, d1ku7a\_,  
 d1kw4a\_, d1l1ya\_, d1l15ta\_, d1l18ja\_, d1l1fb\_, d1l1uza\_, d1lyva\_,  
 d1m6ka\_, d1mai\_, d1mhqb\_, d1mija\_, d1mjc\_, d1msba\_, d1mt0a\_,  
 d1mvea\_, d1myt\_, d1n4ob\_, d1ncna\_, d1nega\_, d1neu\_, d1npsa\_,  
 d1npua\_, d1nrfa\_, d1ntea\_, d1nz6b\_, d1o4ya\_, d1o4zb\_, d1o7va\_,  
 d1od7a\_, d1odza\_, d1oj6b\_, d1ojqa\_, d1p2xa\_, d1p7id\_, d1p9ga\_,  
 d1pa1a\_, d1pbk\_, d1pht\_, d1pkoa\_, d1puja\_, d1pw3a\_, d1pz7a\_,  
 d1q21\_, d1q3oa\_, d1q9ba\_, d1qaua\_, d1qdda\_, d1qg2a\_, d1qhl1a\_,  
 d1qnoa\_, d1qnxa\_, d1qqea\_, d1qu0c\_, d1qvaa\_, d1qxwa\_, d1qzna\_,  
 d1r6va\_, d1r8me\_, d1r9ha\_, d1rt8a\_, d1rzxa\_, d1s02\_, d1sgwa\_,  
 d1sig\_, d1skf\_, d1smba\_, d1smoa\_, d1smxa\_, d1sq9a\_, d1sulb\_,  
 d1t1ga\_, d1t4ob\_, d1t5ia\_, d1t6na\_, d1te5a\_, d1ten\_, d1thm\_,  
 d1tjca\_, d1tpka\_, d1tq6a\_, d1tu9a\_, d1ulka\_, d1u21a\_, d1ujpa\_,  
 d1umoa\_, d1umza\_, d1unpa\_, d1ur0b\_, d1ur2a\_, d1uuqa\_, d1v5ca\_,  
 d1vcub\_, d1vera\_, d1vg8a\_, d1vjza\_, d1vkaa\_, d1vp6a\_, d1w0ha\_,  
 d1wlda\_, d1w30b\_, d1w3ha\_, d1wcha\_, d1wd5a\_, d1wlja\_, d1xal1b\_,  
 d1xaua\_, d1xc4a\_, d1xmja\_, d1xt0b\_, d1xyza\_, d1yfoa\_, d2bema\_,  
 d2cuab\_, d2his\_, d2rmca\_, d2semb\_, d3ovo\_, d3raba\_, d4mata\_,  
 d4vhba\_, d6rxn\_.

**1D\_uniq (151) : Control dataset of Single domain proteins (No multi-domain Homologs found till date in SCOP families v 1.75).**

d1bdb\_, d1bdo\_, d1bea\_, d1bff\_, d1bgc\_, d1bgf\_, d1bgp\_, d1bhe\_,  
d1bhp\_, d1bj7\_, d1bk0\_, d1bk9\_, d1bky\_, d1bm8\_, d1bqk\_, d1bs9\_,  
d1bv1\_, d1bx7\_, d1by2\_, d1bzm\_, d1c3d\_, d1c52\_, d1c53\_, d1cbs\_,  
d1ccr\_, d1cor\_, d1cot\_, d1cpq\_, d1cwn\_, d1cxc\_, d1dhn\_, d1din\_,  
d1doi\_, d1dun\_, d1enj\_, d1ezm\_, d1f3z\_, d1fas\_, d1frd\_, d1fus\_,  
d1fxd\_, d1gai\_, d1gpr\_, d1gsl\_, d1gvp\_, d1hep\_, d1hmr\_, d1hoe\_,  
d1hpi\_, d1huw\_, d1hyp\_, d1icm\_, d1idk\_, d1iob\_, d1jdw\_, d1jer\_,  
d1jug\_, d1kdi\_, d1koe\_, d1lci\_, d1lis\_, d1lki\_, d1lml\_, d1lz6\_,  
d1mdc\_, d1mho\_, d1mn1\_, d1msc\_, d1ncx\_, d1nfp\_, d1nox\_, d1npc\_,  
d1nsj\_, d1ntn\_, d1nxb\_, d1oaa\_, d1onc\_, d1orc\_, d1pch\_, d1pdo\_,  
d1pgx\_, d1pmi\_, d1pmy\_, d1pne\_, d1poc\_, d1prn\_, d1puc\_, d1pvl\_,  
d1r69\_, d1rds\_, d1rkd\_, d1rmg\_, d1rro\_, d1rss\_, d1rtu\_, d1sur\_,  
d1tca\_, d1tgj\_, d1tgl\_, d1thg\_, d1tia\_, d1tib\_, d1tif\_, d1tig\_,  
d1tml\_, d1tsp\_, d1vcc\_, d1vhh\_, d1vie\_, d1vjw\_, d1vns\_, d1vpe\_,  
d1wad\_, d1wba\_, d1wer\_, d1whi\_, d1xer\_, d1xib\_, d1yea\_, d1zrm\_,  
d2a0b\_, d2abk\_, d2acy\_, d2bce\_, d2c2c\_, d2cbp\_, d2cts\_, d2cut\_,  
d2cy3\_, d2erl\_, d2fua\_, d2lbd\_, d2mcm\_, d2pii\_, d2plc\_, d2por\_,  
d2prd\_, d2ptd\_, d2pth\_, d2sn3\_, d2sns\_, d3cbh\_, d3cla\_, d3dni\_,  
d3eng\_, d3il8\_, d3kvt\_, d3lip\_, d3nul\_, d3vub\_, d4bcl\_, d4mt2\_,  
d5pal\_, d7pcy\_.

**PPI\_Obligate (268) : Obligate Protein-Protein Interaction dataset from the PDB for comparison against domain-domain interfaces.**

12as, 1a3c, 1a4i, 1aa7, 1ad3, 1ade, 1af5, 1afw, 1ajs, 1aor, 1aoz, 1aq6, 1auo,  
1b16, 1b3a, 1b5e, 1b67, 1b8a, 1b8j, 1b8z, 1b9h, 1bam, 1bd0, 1bdm, 1bif, 1biq,  
1bis, 1bk5, 1bkp, 1brw, 1bsl, 1bsr, 1buo, 1bxg, 1byf, 1byi, 1byk, 1c4k, 1cd8,  
1chm, 1cmb, 1cnz, 1coz, 1csh, 1ctt, 1czj, 1d0c, 1d2f, 1d9c, 1daa, 1db3, 1dbq,  
1dcf, 1dor, 1dos, 1dpg, 1dqn, 1dqs, 1dxg, 1elz, 1e4m, 1e58, 1e6b, 1e6u, 1e7n,  
1ebh, 1ecy, 1elu, 1ew3, 1ex0, 1eyv, 1f3h, 1f6b, 1f89, 1fc4, 1fg7, 1fi4, 1fip,  
1fjj, 1fp1, 1fp2, 1fp5, 1fro, 1g5c, 1g60, 1g81, 1gd9, 1glj, 1gnw, 1gqi, 1gt3,  
1gta, 1gte, 1gu7, 1gvj, 1gvp, 1gy6, 1gyo, 1h16, 1h1y, 1h7e, 1h9r, 1hf2, 1hpx,  
1hq8, 1hss, 1hw1, 1hxp, 1hzj, 1i07, 1i24, 1i2k, 1i4u, 1i52, 1i69, 1i86, 1imb,  
1is3, 1iup, 1ivy, 1ix9, 1iyz, 1j3b, 1j5p, 1j98, 1jd0, 1jdw, 1jhd, 1jhg, 1jm6,  
1jsc, 1jsg, 1jtv, 1jye, 1jys, 1k04, 1k3y, 1k51, 1k66, 1k94, 1kc7, 1kcm, 1kic,  
1kjq, 1kkj, 1kll, 1kly, 1knq, 1kpf, 1kso, 1kta, 1ktb, 1kzh, 1lc5, 1llf, 1lom,  
1lxe, 1m6p, 1m7y, 1mh9, 1mkb, 1mo9, 1mor, 1mqi, 1mr8, 1mvc, 1mze, 1n1b, 1n26,  
1n2s, 1n55, 1n57, 1n7f, 1nf9, 1nkd, 1nn5, 1noj, 1nox, 1ns5, 1nsj, 1nsy, 1o8b,  
1oaa, 1oac, 1oc2, 1oh0, 1oi6, 1oke, 1on2, 1oqz, 1ov3, 1oyb, 1oys, 1p5f, 1pfq,  
1pre, 1psr, 1puc, 1pv9, 1pxf, 1q3o, 1q4g, 1q6o, 1qfh, 1qhi, 1qi9, 1qj4, 1qjb,  
1qkk, 1qks, 1qr2, 1qvz, 1qyc, 1r2f, 1r31, 1r3s, 1r7a, 1rdo, 1reg, 1rrm, 1ryt,  
1s0a, 1s3e, 1sb8, 1se8, 1ses, 1sjy, 1smn, 1smt, 1sox, 1t0i, 1t5h, 1tcl, 1tox,  
1trb, 1trk, 1tw3, 1ual, 1uby, 1ui8, 1ukg, 1utg, 1v25, 1v2z, 1vfr, 1vhz, 1vls,  
1vok, 1xso, 2arc, 2gsa, 2hdh, 2ilk, 2mjp, 2nac, 2ohx, 2spc, 2tct, 2tgi, 3dap,  
3grs, 3lad, 3ssi, 3vub, 5csm, 5rub, 8prk, 9wga.

## Supplementary References

1. A. Hentati *et al.*, *Ann Neurol* 39, 295 (Mar, 1996).
2. C. A. Gough, T. Gojobori, T. Imanishi, *Proteins* 66, 69 (Jan 1, 2007).
3. R. Rajasekaran, C. Sudandiradoss, C. G. Doss, R. Sethumadhavan, *Genomics* 90, 447 (Oct, 2007).
4. P. A. Ory, M. R. Clark, E. E. Kwoh, S. B. Clarkson, I. M. Goldstein, *J Clin Invest* 84, 1688 (Nov, 1989).
5. F. Ali-Osman, O. Akande, G. Antoun, J. X. Mao, J. Buolamwini, *J Biol Chem* 272, 10004 (Apr 11, 1997).
